# Supplementary material
Source: MDPI journal article supplement (https://www.mdpi.com/1999-4907/12/11/1485)
Supplement: s1 [file s1]

Supplementary Information for the manuscript

## Natural and human-based alterations affect long-term light properties at forest understory in Southern Europe

Ignacio Ruiz de la Cuesta<sup>1</sup>, Juan A. Blanco<sup>1</sup>, J. Bosco Imbert<sup>1</sup>, Javier Peralta<sup>1</sup>, and Javier Rodríguez-Pérez<sup>1,\*</sup>

<sup>1</sup> Institute for Multidisciplinary Applied Biology (IMAB), Departamento de Ciencias, Universidad Pública de Navarra (UPNA), 31006 Pamplona, Spain; [ignaciorc@gmail.com](mailto:ignaciorc@gmail.com) (I.R.d.l.C); [juan.blanco@unavarra.es](mailto:juan.blanco@unavarra.es) (J.A.B.); [bosco.imbert@unavarra.es](mailto:bosco.imbert@unavarra.es) (J.B.I.), [javier.peralta@unavarra.es](mailto:javier.peralta@unavarra.es) (J.P.); [javier.rodriguezperez@unavarra.es](mailto:javier.rodriguezperez@unavarra.es) (J.R.-P.)

\* Correspondence: [javier.rodriguezperez@unavarra.es](mailto:javier.rodriguezperez@unavarra.es); Tel.: +34-948-16-9115

### Appendix S1. Detailed information of material and methods

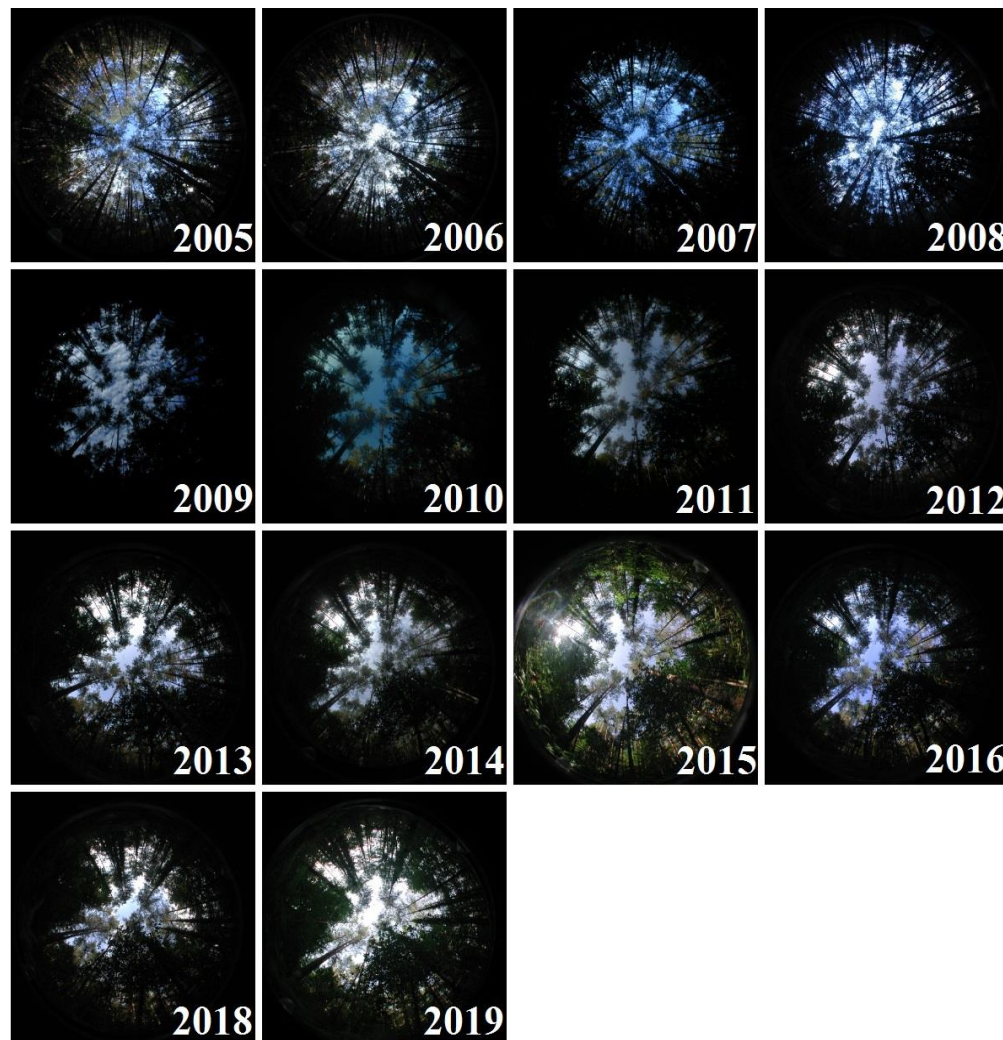

**Figure S1.** Example of raw (unprocessed) hemispherical photographs (HP). Here we only show a sample of a HP for the sampling point 7 in plot 7 (heavy thinning). Dark areas correspond to the vegetation whereas lighter areas to the vegetation and sky.

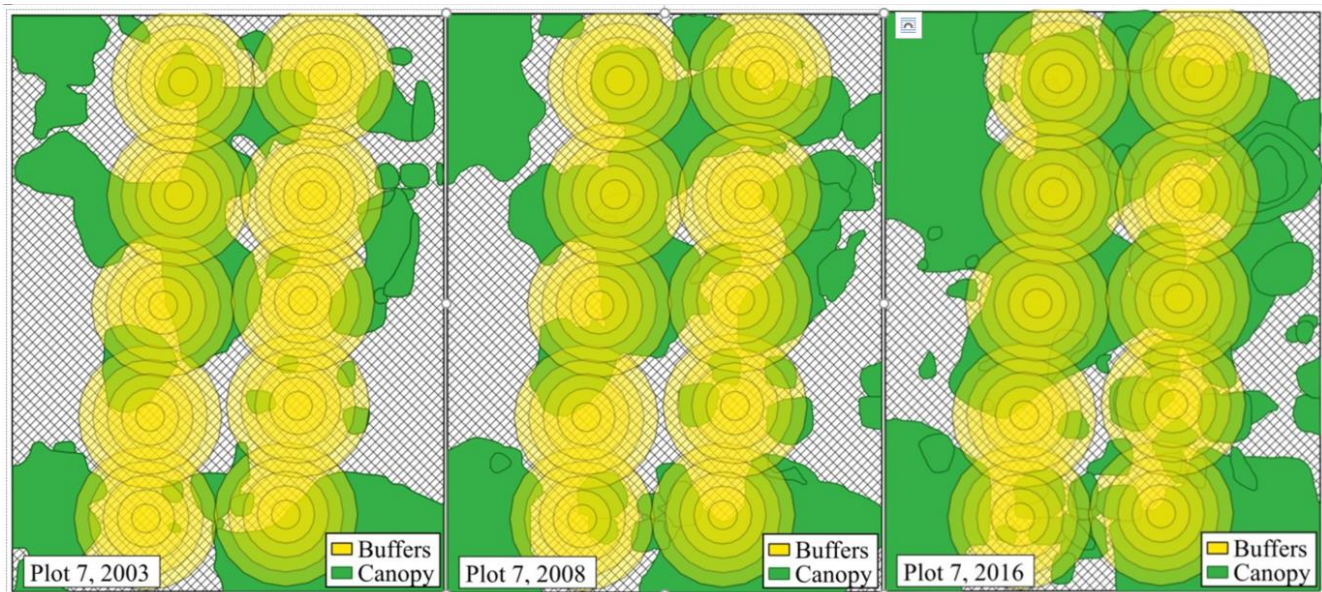

**Figure S2.** Example of maps of the broadleaved canopies and buffer areas around each sampling point for the years 2003, 2008 and 2016 and for the plot 7 (heavy thinning). Broadleaved canopy (represented by green polygons) were assumed to be under a continuous and homogenous layer of Scots pine (top canopy). Areas of increasing radius (buffer) around each sampling point where hemispherical photographs were taken as shown as yellow circles. In order to avoid calculation errors, those buffer areas exceeding the plot limits were cut to fit each plot limits. Calculations were performed with GIS software (QGIS Desktop, version 3.12.3).

**Table S1.** Pair-correlation between light variables, averaged across our studied years. Cross-correlation values between pairs of variables higher than 0.7 are highlighted in red. Empty values showed variables with a fixed value for the whole site, and were not included in calculations. In particular, *DirectAbove* and *DiffAbove* is a light index that depends exclusively on each location and was not variable.

|                | CanOpen | LAI   | DirectAbove | DiffAbove | DirectBelow | DiffBelow | N.Sunflecks | Mdn.Sunflecks | Max.Sunflecks | DirectAbove.Yr | DiffAbove.Yr | DirectBelow.Yr | DiffBelow.Yr |
|----------------|---------|-------|-------------|-----------|-------------|-----------|-------------|---------------|---------------|----------------|--------------|----------------|--------------|
| CanOpen        |         | -0.03 |             |           | 0.44        | 0.86      | 0.33        | 0.07          | 0.16          |                |              | 0.33           | 0.86         |
| LAI            |         |       |             |           | -0.18       | -0.30     | -0.26       | 0.00          | 0.10          |                |              | -0.23          | -0.30        |
| DirectAbove    |         |       |             |           |             |           |             |               |               |                |              |                |              |
| DiffAbove      |         |       |             |           |             |           |             |               |               |                |              |                |              |
| DirectBelow    |         |       |             |           |             | 0.55      | 0.71        | 0.33          | 0.66          |                |              | 0.58           | 0.55         |
| DiffBelow      |         |       |             |           |             |           | 0.40        | 0.13          | 0.26          |                |              | 0.44           | 1.00         |
| N.Sunflecks    |         |       |             |           |             |           |             | -0.08         | 0.18          |                |              | 0.49           | 0.40         |
| Mdn.Sunflecks  |         |       |             |           |             |           |             |               | 0.29          |                |              | 0.11           | 0.13         |
| Max.Sunflecks  |         |       |             |           |             |           |             |               |               |                |              | 0.30           | 0.26         |
| DirectAbove.Yr |         |       |             |           |             |           |             |               |               |                |              |                |              |
| DiffAbove.Yr   |         |       |             |           |             |           |             |               |               |                |              |                |              |
| DirectBelow.Yr |         |       |             |           |             |           |             |               |               |                |              |                | 0.44         |
| DiffBelow.Yr   |         |       |             |           |             |           |             |               |               |                |              |                |              |

**Table S2.** Results of the Ljung-Box test for independence analysis of light variables. For each variable, tow which *p-values* suggest non-stationary time series. Calculations were performed with the “stats” library and the “box.test” function in R statistical language (R Core Team, 2020).

| Variable       | x-squared | df | p-value |
|----------------|-----------|----|---------|
| CanOpen        | 15.03     | 14 | 0.38    |
| LAI            | 13.50     | 14 | 0.49    |
| DirectBelow.Yr | 14.44     | 14 | 0.42    |
| N.Sunflecks    | 24.16     | 14 | 0.04    |
| Mdn.Sunflecks  | 7.99      | 14 | 0.89    |
| Max.Sunflecks  | 6.10      | 14 | 0.96    |

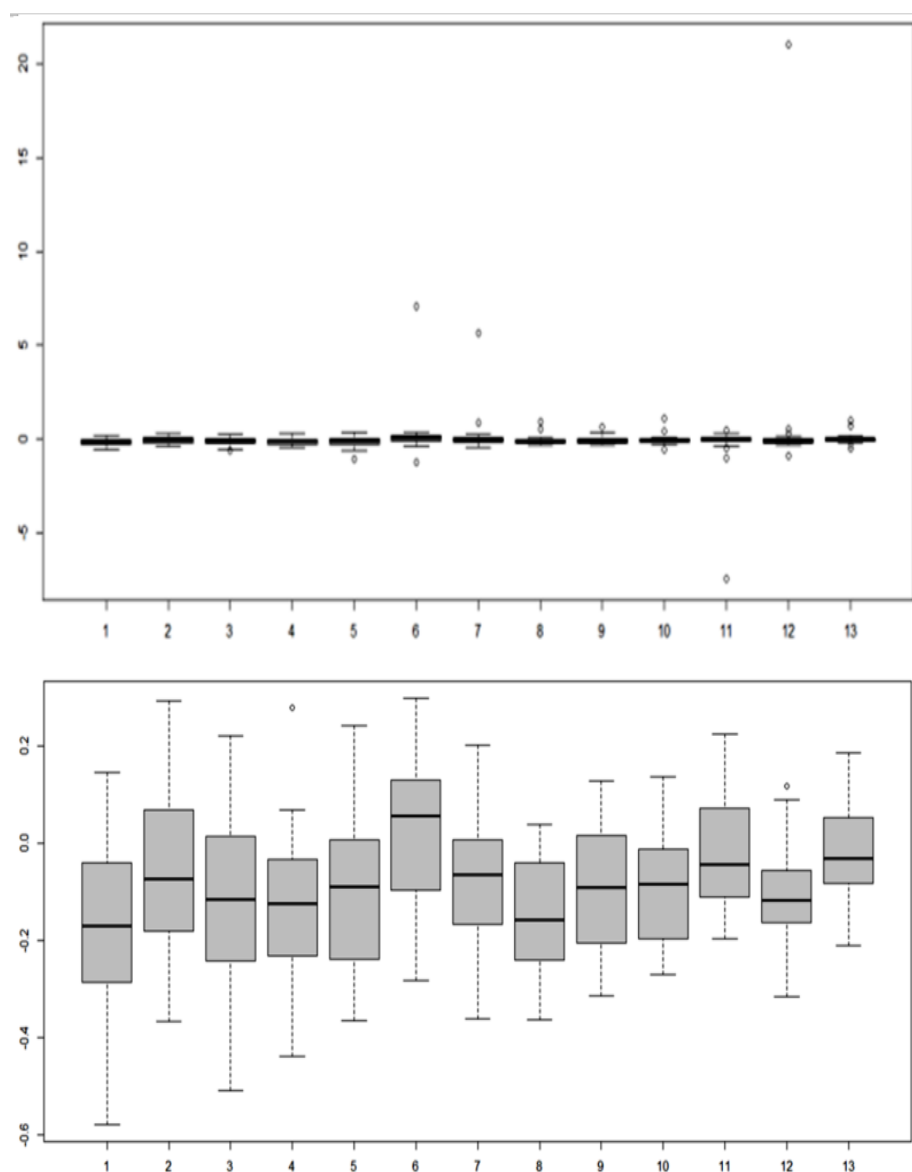

**Figure S3.** Boxplot of value of LAI values, representing lags in the horizontal axis, from 2006 to 2019 (data for the year 2017 were lost), for a total of 13 years since the first year does not count for the analysis (it starts in lag1). To check the effect of latter imputation on the time series, we checked the PACF values prior and post imputations with the aim to weight the importance of outliers in the PACF. When checking the boxplots without mean imputation, outliers weight for the years 2012 (where NAs values was high), 2013 (following a year with little data), and 2018 (followed by a year with missing data, and 2018 having some missing data as well), was too high. This affected further PACF analysis, and induced to think that our results were biased due to NAs weight. On the other side, boxplots with corrected mean were correct and provided stability for the further analysis. Mean was calculated and imputed for each thinning treatment in each year.



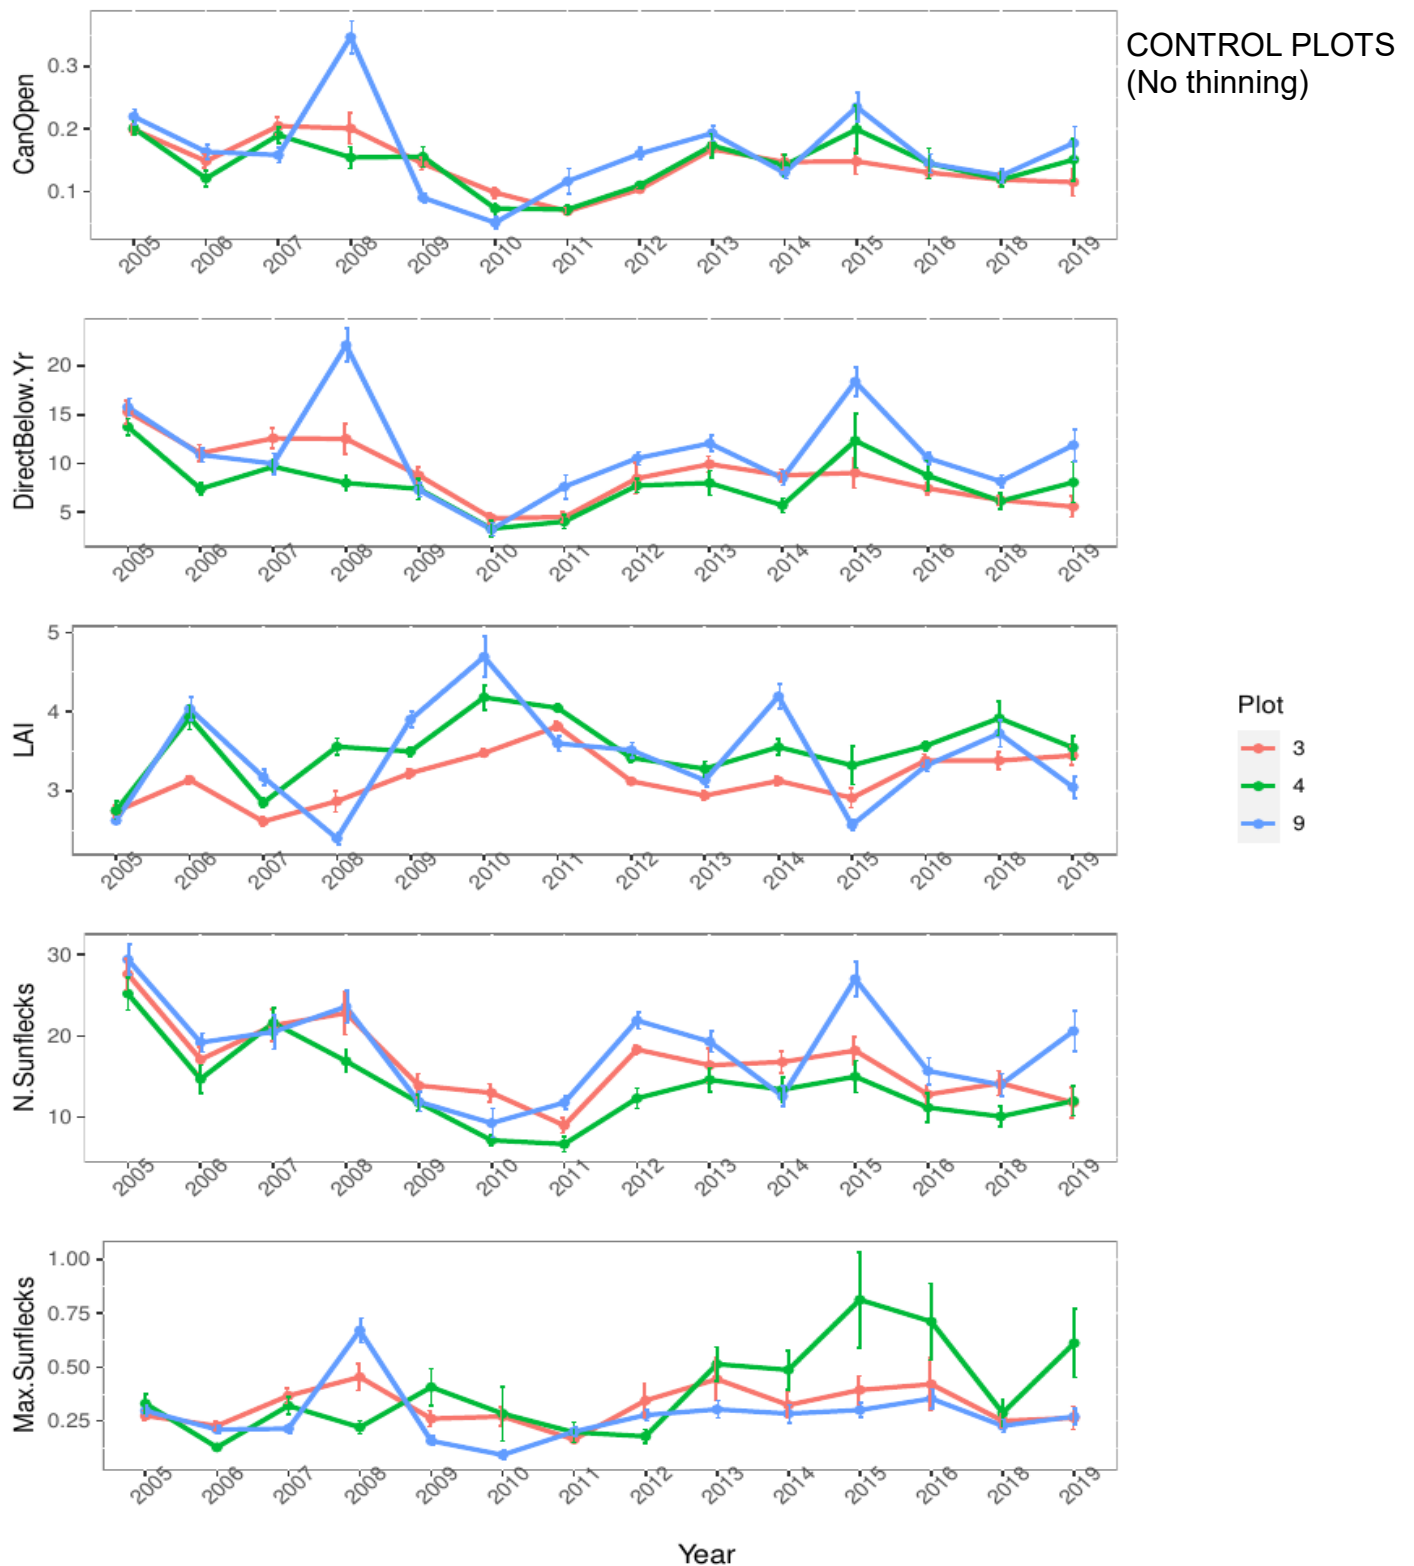

**Figure S4.** Light variables obtained from the hemispherical pictures over the studied years at the control plots. Each line corresponds to a different plot (identified by its number, see Figure 1 in the manuscript). For each light variable and plot, horizontal lines represent the mean values for each year whereas the vertical lines the standard error for each year. *CanOpen* (parts per unit); *LAI* ( $\text{m}^2 \text{m}^{-2}$ ); *DirectBelow.Yr* ( $\mu\text{mol m}^{-2} \text{s}^{-1}$ ); *N.Sunflecks* ( $\mu\text{mol m}^{-2} \text{s}^{-1}$ ); *Max.Sunflecks* (minutes).

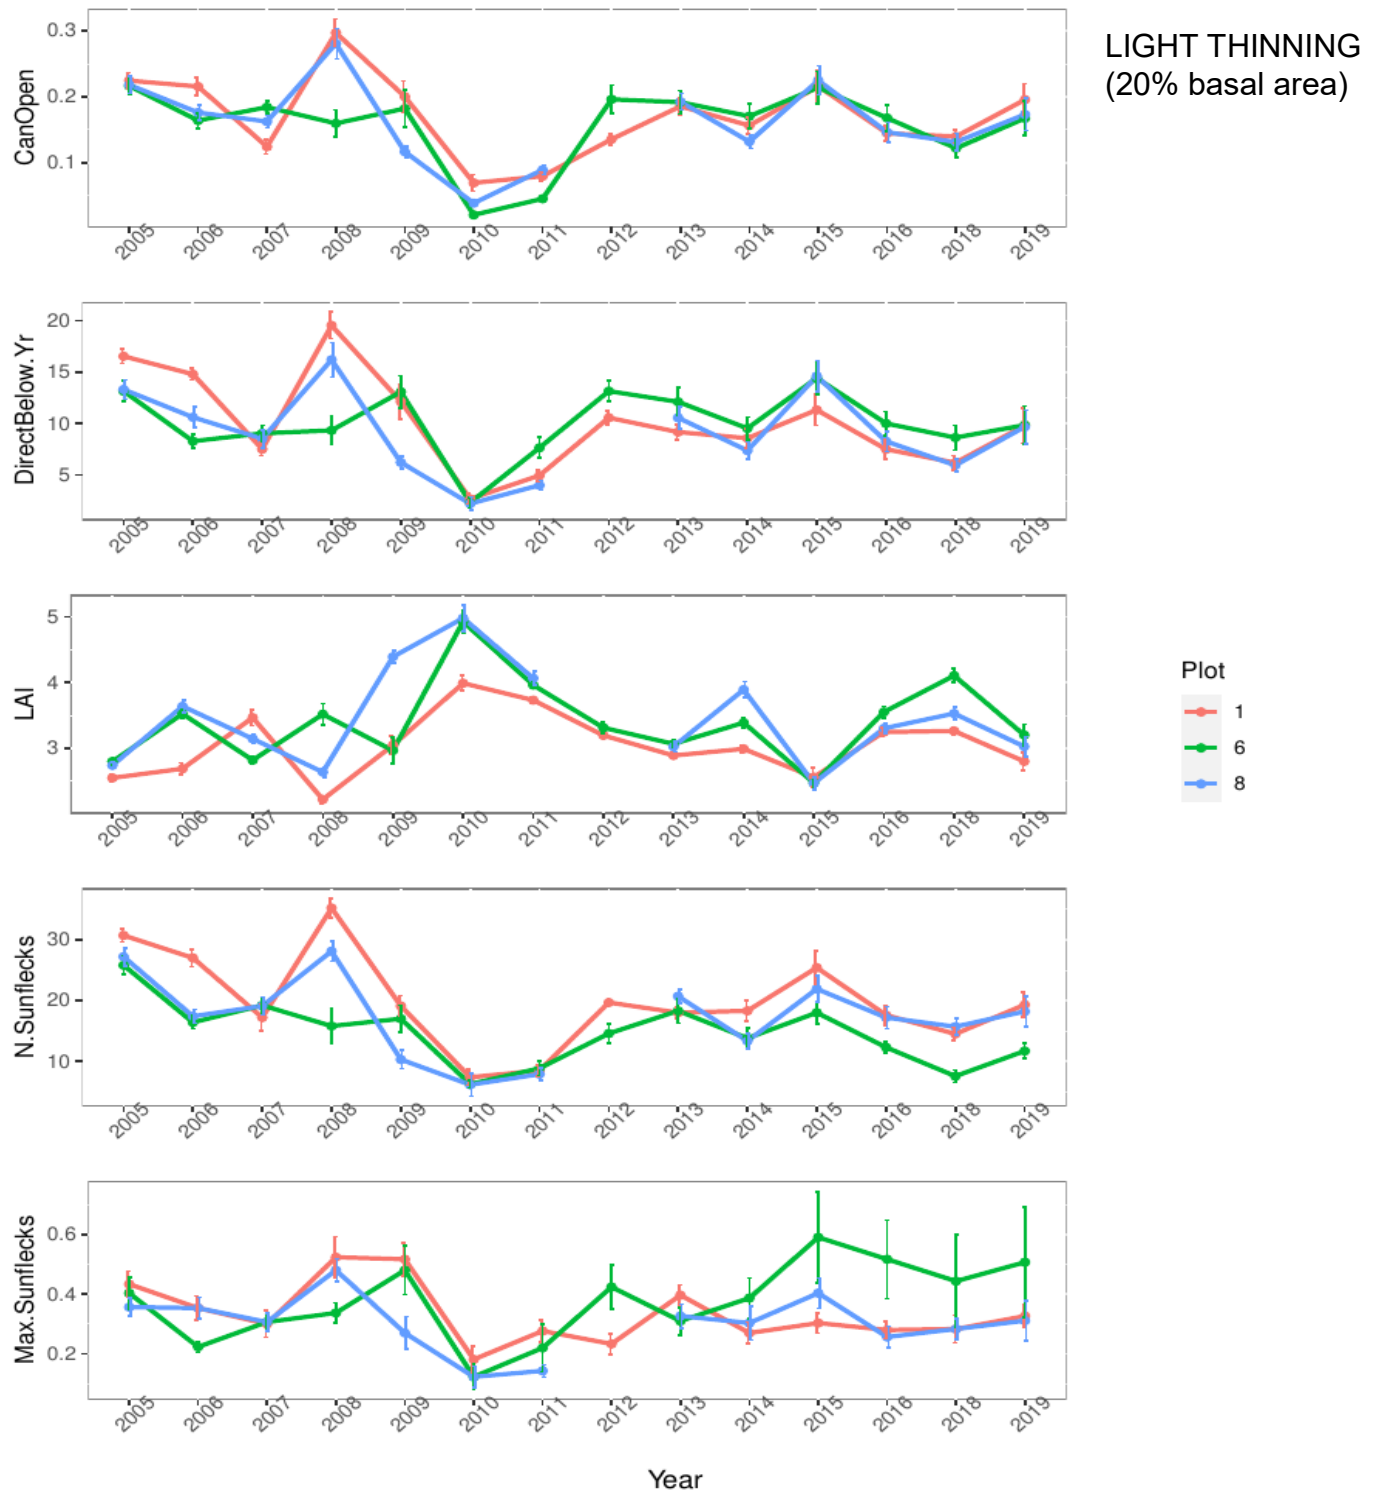

**Figure S5.** Light variables obtained from the hemispherical pictures over the studied years at the light thinning plots (20% basal area removed in 1999 and 2009). Each line corresponds to a different plot (identified by its number, see Figure 1 in the manuscript). For each light variable and plot, horizontal lines represent the mean values for each year whereas the vertical lines the standard error for each year. *CanOpen* (parts per unit); *LAI* ( $\text{m}^2 \text{m}^{-2}$ ); *DirectBelow.Yr* ( $\mu\text{mol m}^{-2} \text{s}^{-1}$ ); *N.Sunflecks* ( $\mu\text{mol m}^{-2} \text{s}^{-1}$ ); *Max.Sunflecks* (minutes).

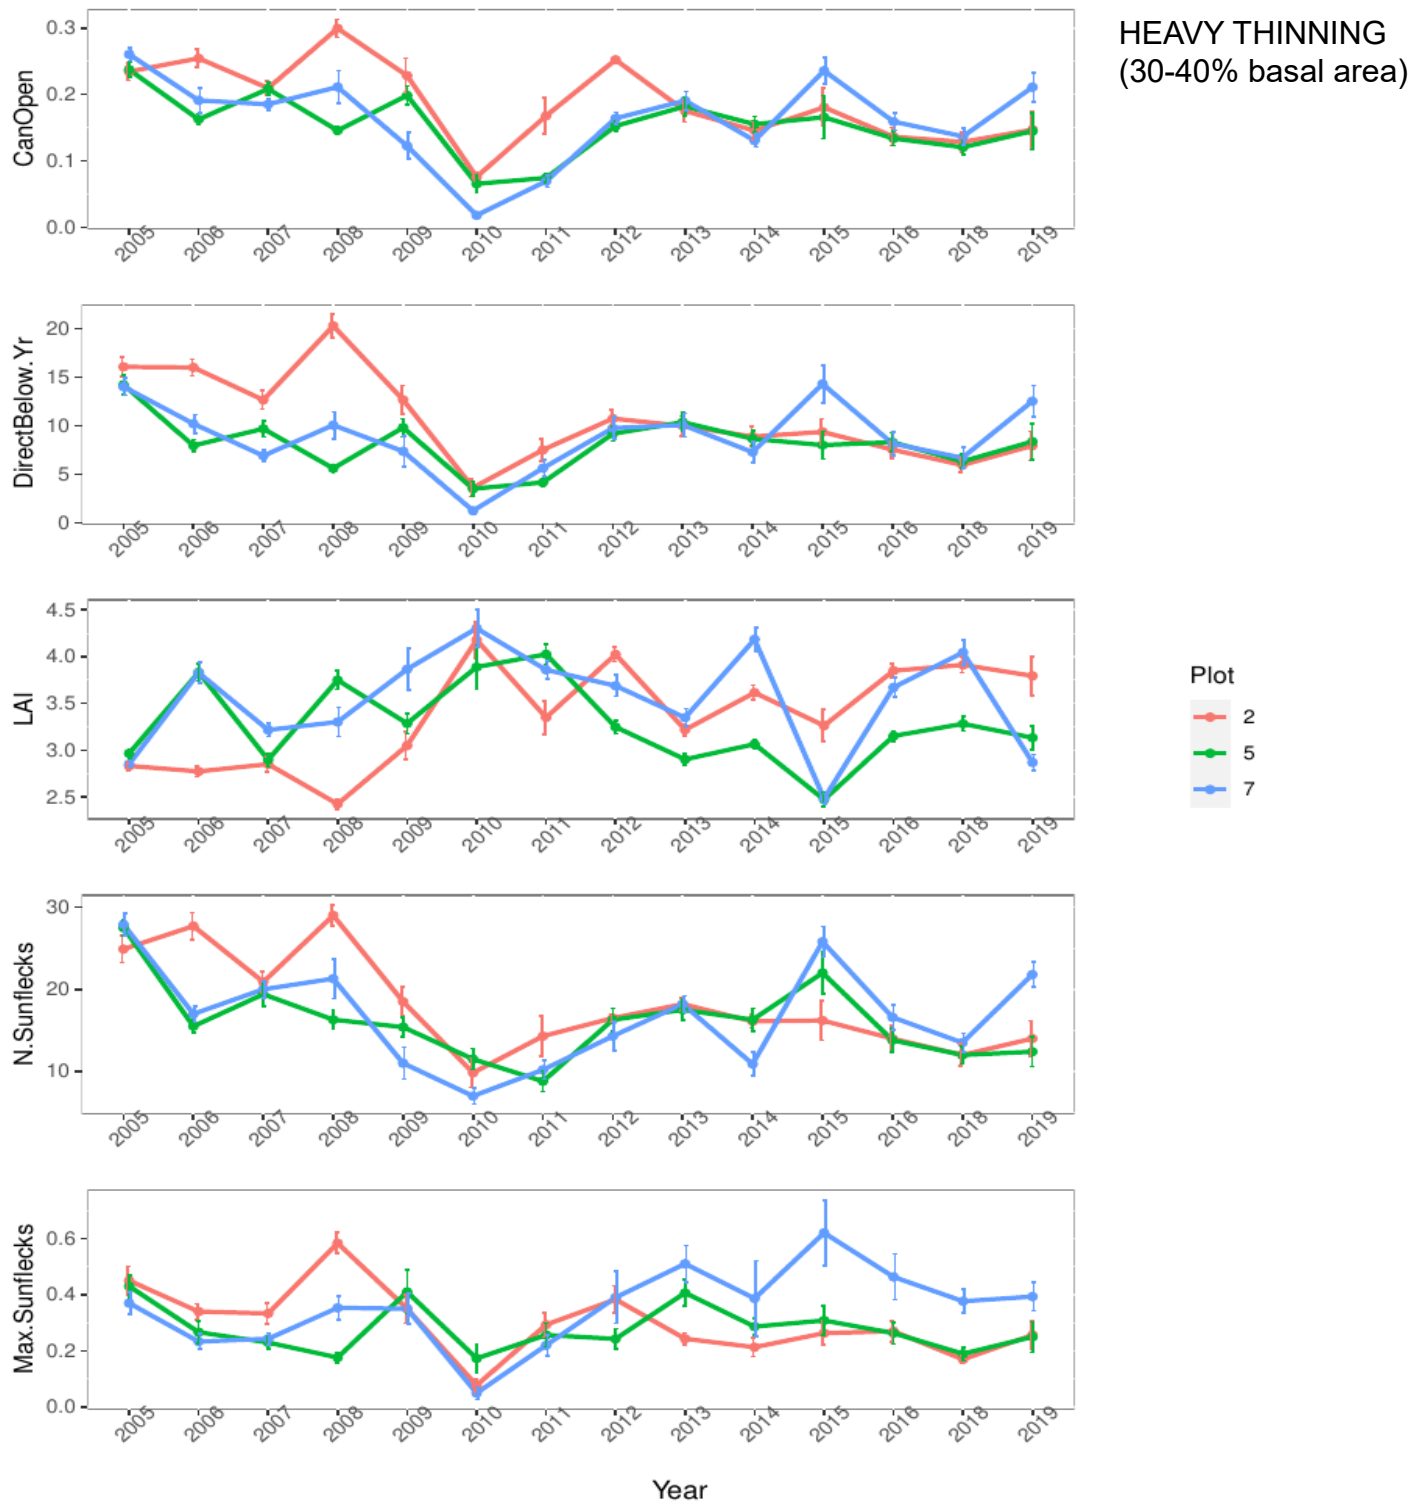

**Figure S6.** Light variables obtained from the hemispherical pictures over the studied years at the control plots (30% and 40% basal area removed in 1999 and 2009, respectively). Each line corresponds to a different plot (identified by its number, see Figure 1 in the manuscript). For each light variable and plot, horizontal lines represent the mean values for each year whereas the vertical lines the standard error for each year. *CanOpen* (parts per unit); *LAI* ( $\text{m}^2 \text{ m}^{-2}$ ); *DirectBelow.Yr* ( $\mu\text{mol m}^{-2} \text{ s}^{-1}$ ); *N.Sunflecks* ( $\mu\text{mol m}^{-2} \text{ s}^{-1}$ ); *Max.Sunflecks* (minutes).

**Table S3.** Results of pairwise contrasts between consecutive years for light variables. The number in the “treatment” and “plot” lines indicate the total number of significant pairwise contrasts obtained for the whole monitoring period, whereas the number between brackets besides each year indicates the number of significant pairwise contrast in which that year was involved. Only the five years with the highest number of significant contrasts are shown for each variable.

|           | <b>CanOpen</b> | <b>LAI</b> | <b>DirectBelow.Yr</b> | <b>N.Sunflecks</b> | <b>Max.Sunflecks</b> |
|-----------|----------------|------------|-----------------------|--------------------|----------------------|
| Treatment | 15             | 32         | 15                    | 14                 | 4                    |
|           | 2009 (8)       | 2015 (11)  | 2009 (8)              | 2008 (6)           | 2010 (4)             |
|           | 2008 (5)       | 2009 (9)   | 2010 (5)              | 2009 (6)           | 2009 (3)             |
|           | 2010 (4)       | 2006 (9)   | 2015 (5)              | 2005 (3)           | 2011 (1)             |
|           | 2005 (2)       | 2010 (7)   | 2008 (4)              | 2006 (3)           | -                    |
|           | 2006 (2)       | 2005 (7)   | 2016 (3)              | 2011 (2)           | -                    |
| Plot      | 33             | 126        | 34                    | 12                 | 3                    |
|           | 2008 (22)      | 2009 (44)  | 2008 (26)             | 2008 (11)          | 2010 (3)             |
|           | 2009 (19)      | 2010 (43)  | 2009 (14)             | 2009 (8)           | 2009 (2)             |
|           | 2010 (11)      | 2015 (31)  | 2007 (10)             | 2014 (2)           | 2011 (1)             |
|           | 2007 (8)       | 2014 (28)  | 2010 (5)              | 2015 (2)           | -                    |
|           | -              | 2008 (23)  | 2015 (5)              | 2007 (1)           | -                    |

**Table S4.** Results of pairwise contrasts between consecutive years for PACFs. The number in the “treatment” and “plot” lines indicate the total number of significant pairwise contrasts obtained for the whole monitoring period, whereas the number between brackets besides each year indicates the number of significant pairwise contrast in which that year was involved. Only the five years with the highest number of significant contrast are shown for each variable.

|           | <b>CanOpen</b> | <b>LAI</b> | <b>DirectBelow.Yr</b> | <b>N.Sunflecks</b> | <b>Max.Sunflecks</b> |
|-----------|----------------|------------|-----------------------|--------------------|----------------------|
| Treatment | 24             | 5          | 27                    | 5                  | 5                    |
|           | 2006 (14)      | 2006 (4)   | 2006 (12)             | 2012 (6)           | 2006 (4)             |
|           | 2011 (9)       | 2005 (2)   | 2005 (9)              | 2005 (3)           | 2005 (3)             |
|           | 2012 (9)       | 2007 (2)   | 2011 (9)              | 2006 (3)           | 2007 (2)             |
|           | 2005 (5)       | 2011 (1)   | 2012 (8)              | 2007 (1)           | 2008 (1)             |
|           | 2007 (3)       | -          | 2010 (5)              | 2008 (1)           | -                    |
| Plot      | 71             | 27         | 75                    | 1                  | 5                    |
|           | 2006 (42)      | 2006 (15)  | 2006 (38)             | 2005 (1)           | 2005 (5)             |
|           | 2005 (39)      | 2007 (11)  | 2005 (28)             | 2006 (1)           | 2006 (4)             |
|           | 2011 (23)      | 2005 (6)   | 2011 (19)             | -                  | 2007 (1)             |
|           | 2012 (22)      | 2008 (6)   | 2007 (18)             | -                  | -                    |
|           | 2009 (3)       | 2009 (5)   | 2012 (16)             | -                  | -                    |



**Table S5.** Results of univariate GLMMs showing the relationship between (a) thinning treatment or (b) plots as fixed (independent) factors to explain *CanOpen*. In both groups of models, we included year as fixed factor. In both models, sampling point (S.Point) was included as within-subject random factor. In bold, significant probability ( $P < 0.05$ ).

a) Results including Thinning treatment

| Variability source    | Df | Sum Sq | Mean Sq | F value | Pr (>F) |
|-----------------------|----|--------|---------|---------|---------|
| Thinning              | 2  | 0.048  | 0.024   | 0.681   | 0.509   |
| Year                  | 2  | 0.110  | 0.055   | 1.560   | 0.216   |
| Thinning:Year         | 3  | 0.024  | 0.008   | 0.225   | 0.879   |
| Residuals             | 82 | 2.901  | 0.035   |         |         |
| <b>Error: S.Point</b> |    |        |         |         |         |

| Variability source         | Df   | Sum Sq | Mean Sq | F value | Pr (>F)          |
|----------------------------|------|--------|---------|---------|------------------|
| Year                       | 13   | 2.698  | 0.208   | 65.908  | <b>&lt;0.001</b> |
| Thinning:Year              | 26   | 0.189  | 0.007   | 2.312   | <b>&lt;0.001</b> |
| Residuals                  | 1078 | 3.395  | 0.003   |         |                  |
| <b>Error: S.Point:Year</b> |      |        |         |         |                  |

b) Results including Plot

| Variability source    | Df | Sum Sq | Mean Sq | F value | Pr (>F) |
|-----------------------|----|--------|---------|---------|---------|
| Plot                  | 8  | 0.174  | 0.022   | 0.616   | 0.762   |
| Year                  | 2  | 0.101  | 0.050   | 1.425   | 0.247   |
| Plot:Year             | 6  | 0.235  | 0.039   | 1.113   | 0.363   |
| Residuals             | 73 | 2.573  | 0.035   |         |         |
| <b>Error: S.Point</b> |    |        |         |         |         |

| Variability source         | Df   | Sum Sq | Mean Sq | F value | Pr (>F)          |
|----------------------------|------|--------|---------|---------|------------------|
| Year                       | 13   | 2.698  | 0.208   | 81.021  | <b>&lt;0.001</b> |
| Plot:Year                  | 103  | 1.020  | 0.010   | 3.865   | <b>&lt;0.001</b> |
| Residuals                  | 1001 | 2.564  | 0.003   |         |                  |
| <b>Error: S.Point:Year</b> |      |        |         |         |                  |

**Table S6.** Results of univariate GLMMs showing the relationship between (a) thinning treatment or (b) plots as fixed (independent) factors to explain *LAI*. In both groups of models, we included year as fixed factor. In both models, sampling point (S.Point) was included as within-subject random factor. In bold, significant probability ( $P < 0.05$ ).

a) Results including Thinning treatment

| Variability source    | Df | Sum Sq | Mean Sq | F value | Pr (>F) |
|-----------------------|----|--------|---------|---------|---------|
| Thinning              | 2  | 3.190  | 1.596   | 2.070   | 0.134   |
| Year                  | 8  | 8.640  | 1.080   | 1.400   | 0.211   |
| Thinning:Year         | 7  | 8.170  | 1.167   | 1.513   | 0.177   |
| Residuals             | 72 | 55.520 | 0.771   |         |         |
| <b>Error: S.Point</b> |    |        |         |         |         |

| Variability source         | Df   | Sum Sq  | Mean Sq | F value | Pr (>F)          |
|----------------------------|------|---------|---------|---------|------------------|
| Year                       | 13   | 200.600 | 15.432  | 54.720  | <b>&lt;0.001</b> |
| Thinning:Year              | 26   | 15.400  | 0.592   | 2.100   | <b>0.001</b>     |
| Residuals                  | 1050 | 296.100 | 0.282   |         |                  |
| <b>Error: S.Point:Year</b> |      |         |         |         |                  |

b) Results including Plot

| Variability source    | Df | Sum Sq | Mean Sq | F value | Pr (>F)          |
|-----------------------|----|--------|---------|---------|------------------|
| Plot                  | 8  | 26.840 | 3.355   | 6.288   | <b>&lt;0.001</b> |
| Year                  | 8  | 4.260  | 0.533   | 0.998   | 0.447            |
| Plot:Year             | 11 | 11.350 | 1.032   | 1.933   | 0.052            |
| Residuals             | 62 | 33.080 | 0.534   |         |                  |
| <b>Error: S.Point</b> |    |        |         |         |                  |

| Variability source         | Df  | Sum Sq  | Mean Sq | F value | Pr (>F)          |
|----------------------------|-----|---------|---------|---------|------------------|
| Year                       | 13  | 200.600 | 15.432  | 76.630  | <b>&lt;0.001</b> |
| Plot:Year                  | 103 | 115.500 | 1.122   | 5.571   | <b>&lt;0.001</b> |
| Residuals                  | 973 | 195.900 | 0.201   |         |                  |
| <b>Error: S.Point:Year</b> |     |         |         |         |                  |

**Table S7.** Results of univariate GLMMs showing the relationship between (a) thinning treatment or (b) plots as fixed (independent) factors to explain *DirectBelow.Yr*. In both groups of models, we included year as fixed factor. In both models, sampling point (S.Point) was included as within-subject random factor. In bold, significant probability ( $P < 0.05$ ).

a) Results including Thinning treatment

| <b>Variability source</b> | <b>Df</b> | <b>Sum Sq</b> | <b>Mean Sq</b> | <b>F value</b> | <b>Pr (&gt;F)</b> |
|---------------------------|-----------|---------------|----------------|----------------|-------------------|
| Thinning                  | 2         | 51.000        | 25.480         | 0.168          | 0.846             |
| Year                      | 2         | 254.000       | 126.860        | 0.836          | 0.437             |
| Thinning:Year             | 3         | 529.000       | 176.270        | 1.161          | 0.330             |
| Residuals                 | 82        | 12444.000     | 151.760        |                |                   |
| <b>Error: S.Point</b>     |           |               |                |                |                   |

  

| <b>Variability source</b>  | <b>Df</b> | <b>Sum Sq</b> | <b>Mean Sq</b> | <b>F value</b> | <b>Pr (&gt;F)</b> |
|----------------------------|-----------|---------------|----------------|----------------|-------------------|
| Year                       | 13        | 11291.000     | 868.600        | 54.350         | <b>&lt;0.001</b>  |
| Thinning:Year              | 26        | 588.000       | 22.600         | 1.414          | 0.082             |
| Residuals                  | 1078      | 17227.000     | 16.000         |                |                   |
| <b>Error: S.Point:Year</b> |           |               |                |                |                   |

b) Results including Plot

| <b>Variability source</b> | <b>Df</b> | <b>Sum Sq</b> | <b>Mean Sq</b> | <b>F value</b> | <b>Pr (&gt;F)</b> |
|---------------------------|-----------|---------------|----------------|----------------|-------------------|
| Plot                      | 8         | 1395.000      | 174.320        | 1.132          | 0.352             |
| Year                      | 2         | 28.000        | 13.980         | 0.091          | 0.913             |
| Plot:Year                 | 6         | 619.000       | 103.170        | 0.670          | 0.674             |
| Residuals                 | 73        | 11236.000     | 153.920        |                |                   |
| <b>Error: S.Point</b>     |           |               |                |                |                   |

  

| <b>Variability source</b>  | <b>Df</b> | <b>Sum Sq</b> | <b>Mean Sq</b> | <b>F value</b> | <b>Pr (&gt;F)</b> |
|----------------------------|-----------|---------------|----------------|----------------|-------------------|
| Year                       | 13        | 11291.000     | 868.600        | 68.590         | <b>&lt;0.001</b>  |
| Plot:Year                  | 103       | 5139.000      | 49.900         | 3.940          | <b>&lt;0.001</b>  |
| Residuals                  | 1001      | 12676.000     | 12.700         |                |                   |
| <b>Error: S.Point:Year</b> |           |               |                |                |                   |

**Table S8.** Results of univariate GLMMs showing the relationship between (a) thinning treatment or (b) plots as fixed (independent) factors to explain *N.Sunflecks*. In both groups of models, we included year as fixed factor. In both models, sampling point (S.Point) was included as within-subject random factor. In bold, significant probability ( $P < 0.05$ ).

a) Results including Thinning treatment

| Variability source    | Df | Sum Sq    | Mean Sq | F value | Pr (>F) |
|-----------------------|----|-----------|---------|---------|---------|
| Thinning              | 2  | 288.000   | 144.200 | 0.751   | 0.475   |
| Year                  | 7  | 2303.000  | 329.000 | 1.714   | 0.119   |
| Thinning:Year         | 5  | 293.000   | 58.500  | 0.305   | 0.909   |
| Residuals             | 75 | 14399.000 | 192.000 |         |         |
| <b>Error: S.Point</b> |    |           |         |         |         |

| Variability source         | Df   | Sum Sq    | Mean Sq  | F value | Pr (>F)          |
|----------------------------|------|-----------|----------|---------|------------------|
| Year                       | 13   | 28109.000 | 2162.200 | 52.030  | <b>&lt;0.001</b> |
| Thinning:Year              | 26   | 1560.000  | 60.000   | 1.444   | 0.070            |
| Residuals                  | 1037 | 43095.000 | 41.600   |         |                  |
| <b>Error: S.Point:Year</b> |      |           |          |         |                  |

b) Results including S.Point

| Variability source    | Df | Sum Sq   | Mean Sq | F value | Pr (>F)      |
|-----------------------|----|----------|---------|---------|--------------|
| Plot                  | 8  | 3491.000 | 436.400 | 2.895   | <b>0.009</b> |
| Year                  | 7  | 1620.000 | 231.500 | 1.535   | 0.173        |
| Plot:Year             | 14 | 3124.000 | 223.200 | 1.480   | 0.147        |
| Residuals             | 60 | 9047.000 | 150.800 |         |              |
| <b>Error: S.Point</b> |    |          |         |         |              |

| Variability source         | Df  | Sum Sq    | Mean Sq  | F value | Pr (>F)          |
|----------------------------|-----|-----------|----------|---------|------------------|
| Year                       | 13  | 28109.000 | 2162.200 | 57.723  | <b>&lt;0.001</b> |
| Plot:Year                  | 103 | 8694.000  | 84.400   | 2.253   | <b>&lt;0.001</b> |
| Residuals                  | 960 | 35961.000 | 37.500   |         |                  |
| <b>Error: S.Point:Year</b> |     |           |          |         |                  |

**Table S9.** Results of univariate GLMMs showing the relationship between (a) thinning treatment or (b) plots as fixed (independent) factors to explain *Max.Sunflecks*. In both groups of models, we included year as fixed factor. In both models, sampling point (S.Point) was included as within-subject random factor. In bold, significant probability ( $P < 0.05$ ).

a) Results including Thinning treatment

| Variability source    | Df | Sum Sq | Mean Sq | F value | Pr (>F) |
|-----------------------|----|--------|---------|---------|---------|
| Thinning              | 2  | 0.170  | 0.085   | 0.284   | 0.753   |
| Year                  | 7  | 1.798  | 0.257   | 0.856   | 0.545   |
| Thinning:Year         | 7  | 2.882  | 0.412   | 1.373   | 0.230   |
| Residuals             | 73 | 21.890 | 0.300   |         |         |
| <b>Error: S.Point</b> |    |        |         |         |         |

| Variability source         | Df   | Sum Sq | Mean Sq | F value | Pr (>F)          |
|----------------------------|------|--------|---------|---------|------------------|
| Year                       | 13   | 7.150  | 0.550   | 8.854   | <b>&lt;0.001</b> |
| Thinning:Year              | 26   | 2.000  | 0.077   | 1.239   | 0.190            |
| Residuals                  | 1067 | 66.300 | 0.062   |         |                  |
| <b>Error: S.Point:Year</b> |      |        |         |         |                  |

b) Results including S.Point

| Variability source    | Df | Sum Sq | Mean Sq | F value | Pr (>F) |
|-----------------------|----|--------|---------|---------|---------|
| Plot                  | 8  | 1.863  | 0.233   | 0.748   | 0.649   |
| Year                  | 7  | 2.446  | 0.350   | 1.122   | 0.360   |
| Plot:Year             | 9  | 2.192  | 0.244   | 0.782   | 0.634   |
| Residuals             | 65 | 20.240 | 0.311   |         |         |
| <b>Error: S.Point</b> |    |        |         |         |         |

| Variability source         | Df  | Sum Sq    | Mean Sq | F value | Pr (>F)          |
|----------------------------|-----|-----------|---------|---------|------------------|
| Year                       | 13  | 7.150     | 0.550   | 9.401   | <b>&lt;0.001</b> |
| Plot:Year                  | 103 | 10.370    | 0.101   | 1.720   | <b>&lt;0.001</b> |
| Residuals                  | 960 | 35961.000 | 37.500  |         |                  |
| <b>Error: S.Point:Year</b> |     |           |         |         |                  |



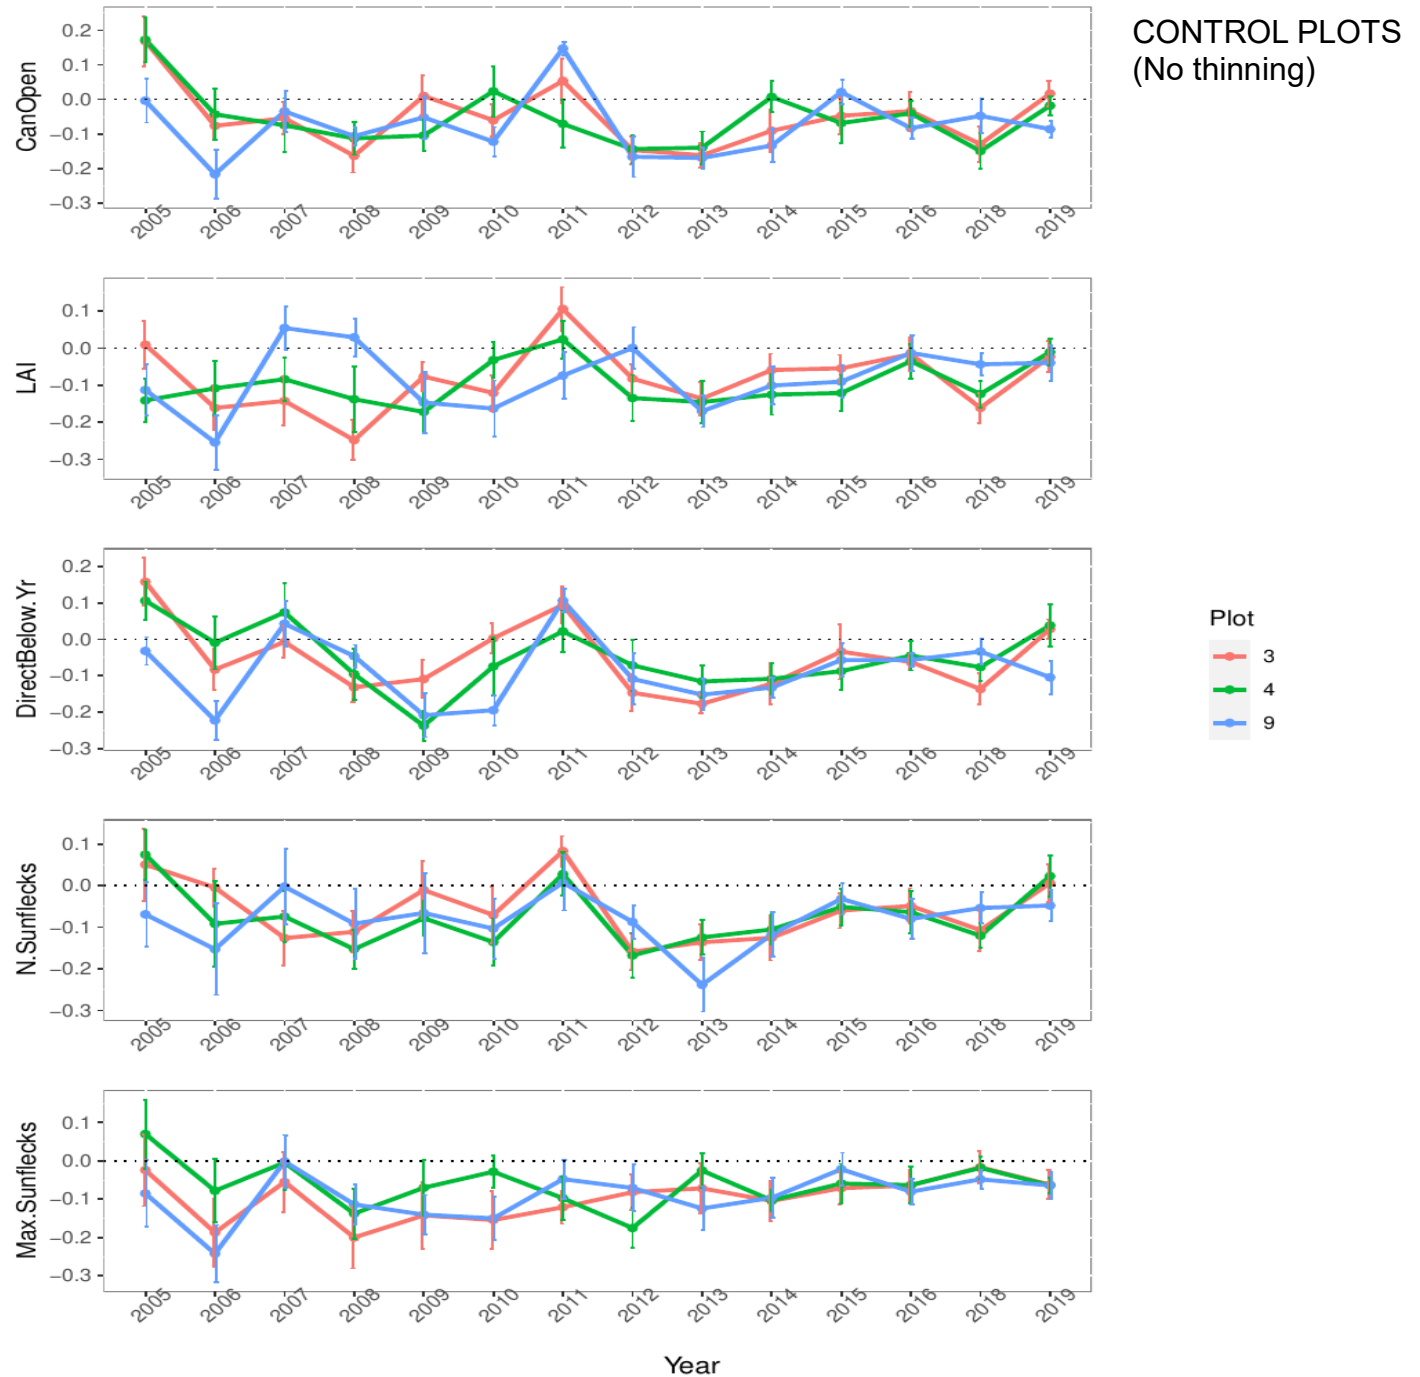

**Figure S7.** PACF for the light variables along the study years in the control plots. The vertical axis represents the values the PACF, and the horizontal axis represents the years. Each line corresponds to a different plot (see Figure 1 in the manuscript). For the vertical axis, values close to zero (dashed lines) show that there is no temporal autocorrelation of the values of each light variable in respect to the previous year, whereas values close to 1.0 or -1.0 indicates positive or negative autocorrelation values, respectively. For each light variable and plot, horizontal lines represent the mean values for each year whereas the vertical lines the standard error for each year.

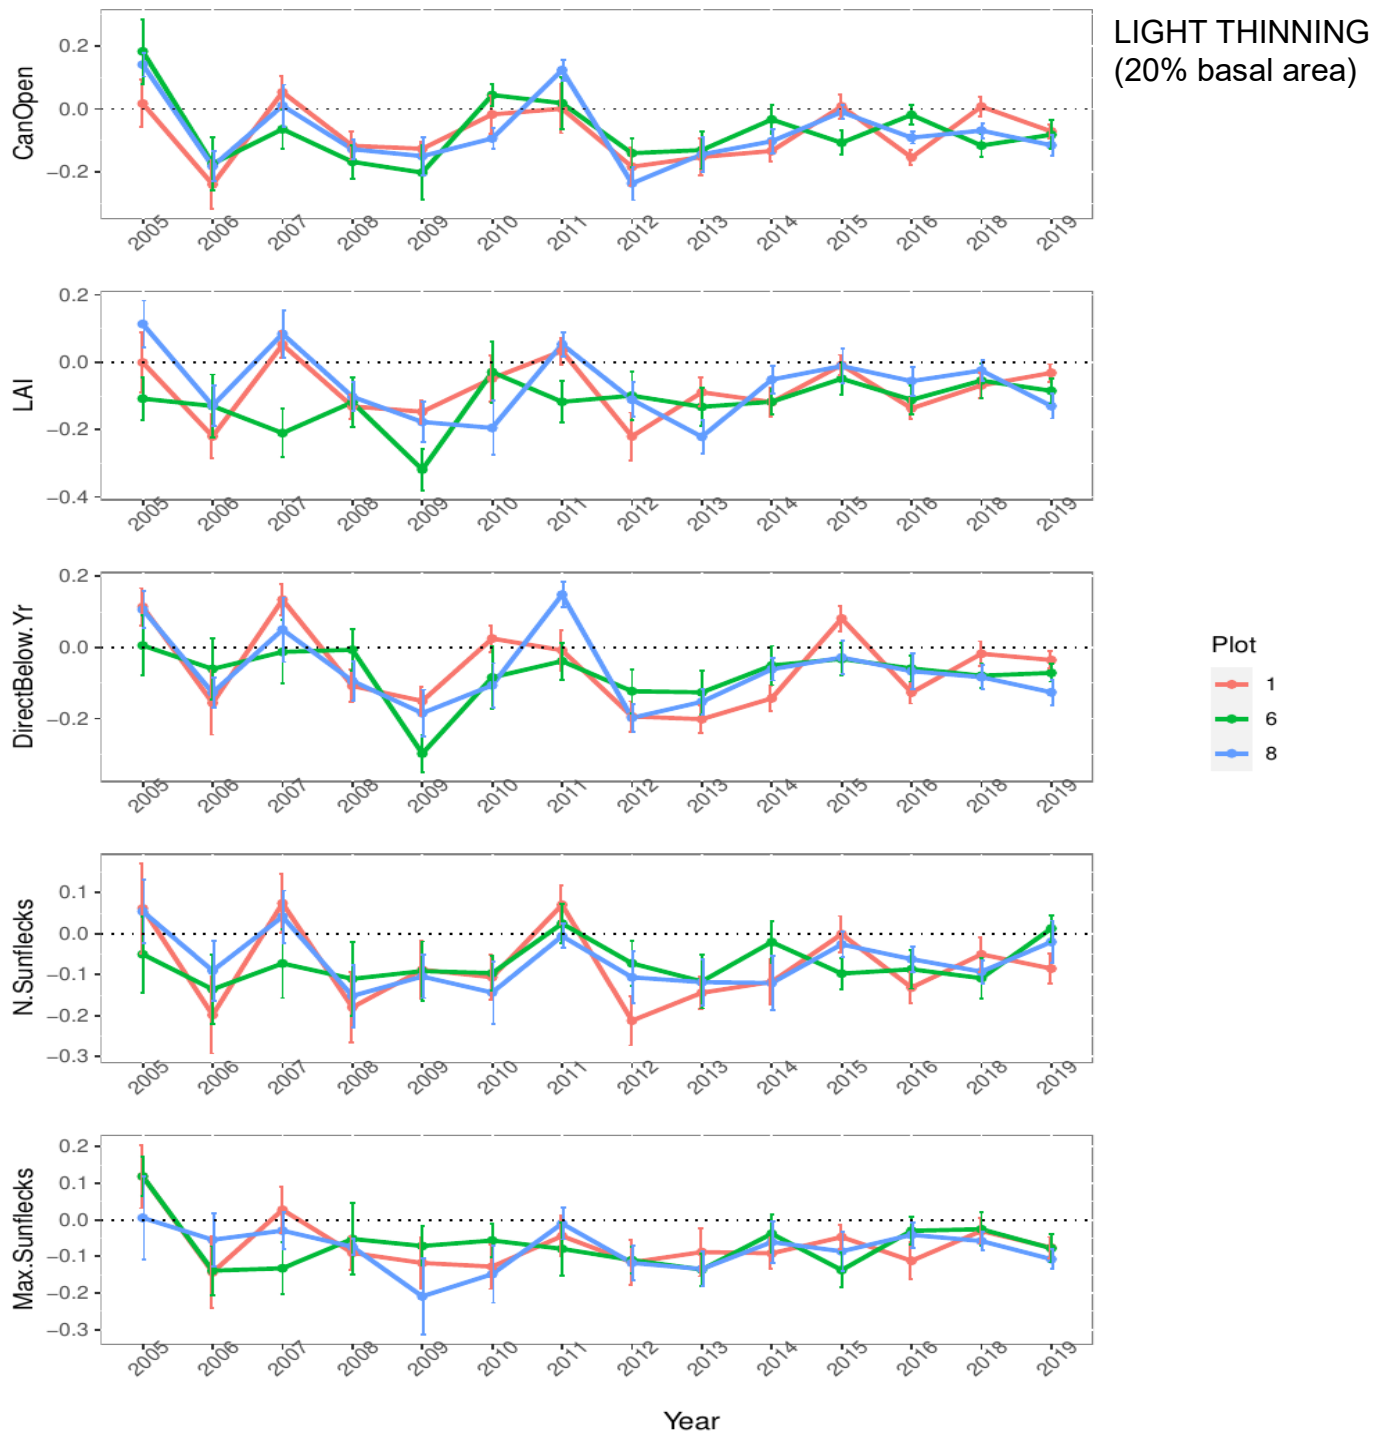

**Figure S8.** PACF for the light variables along the study years in the light thinning plots. The vertical axis represents the values the PACF, and the horizontal axis represents the years. Each line corresponds to a different plot (see Figure 1 in the manuscript). For the vertical axis, values close to zero (dashed lines) show that there is no temporal autocorrelation of the values of each light variable in respect to the previous year, whereas values close to 1.0 or -1.0 indicates positive or negative autocorrelation values, respectively. For each light variable and plot, horizontal lines represent the mean values for each year whereas the vertical lines the standard error for each year.

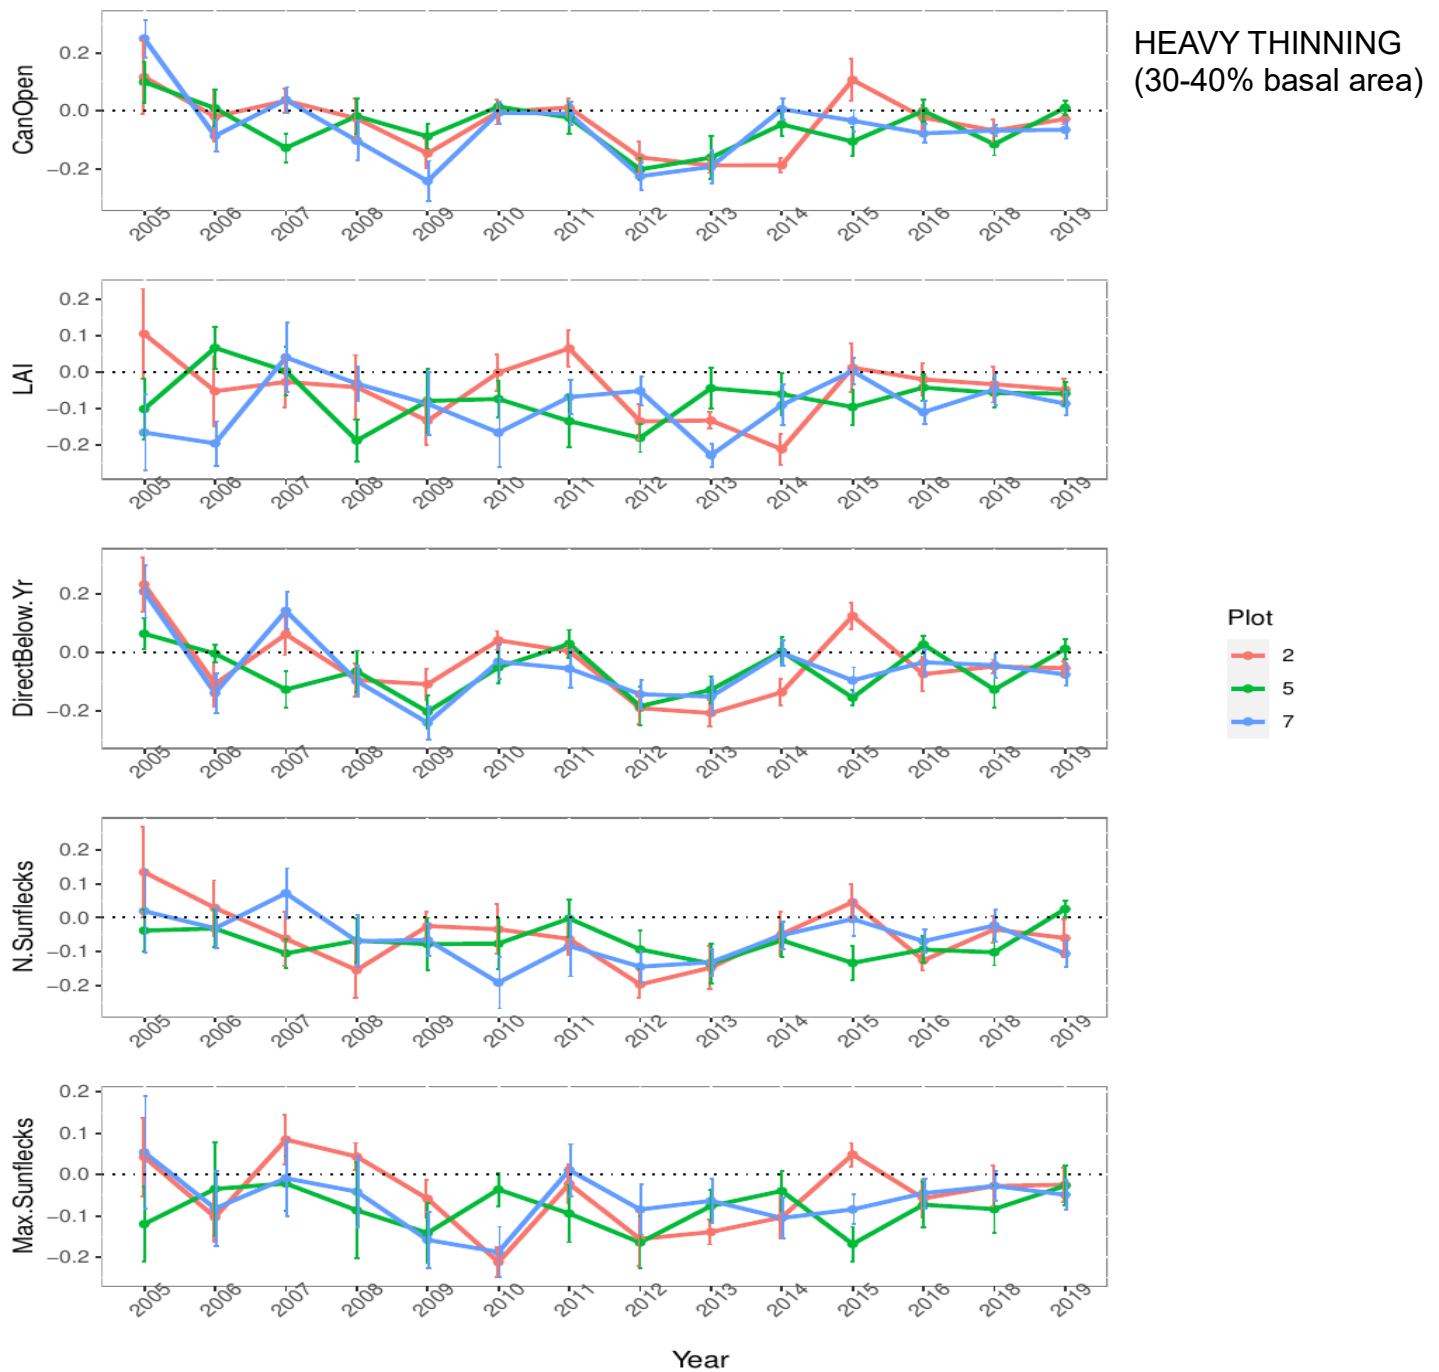

**Figure S9.** PACF for the light variables along the study years in the heavy thinning plots. The vertical axis represents the values the PACF, and the horizontal axis represents the years. Each line corresponds to a different plot (see Figure 1 in the manuscript). For the vertical axis, values close to zero (dashed lines) show that there is no temporal autocorrelation of the values of each light variable in respect to the previous year, whereas values close to 1.0 or -1.0 indicates positive or negative autocorrelation values, respectively. For each light variable and plot, horizontal lines represent the mean values for each year whereas the vertical lines the standard error for each year.

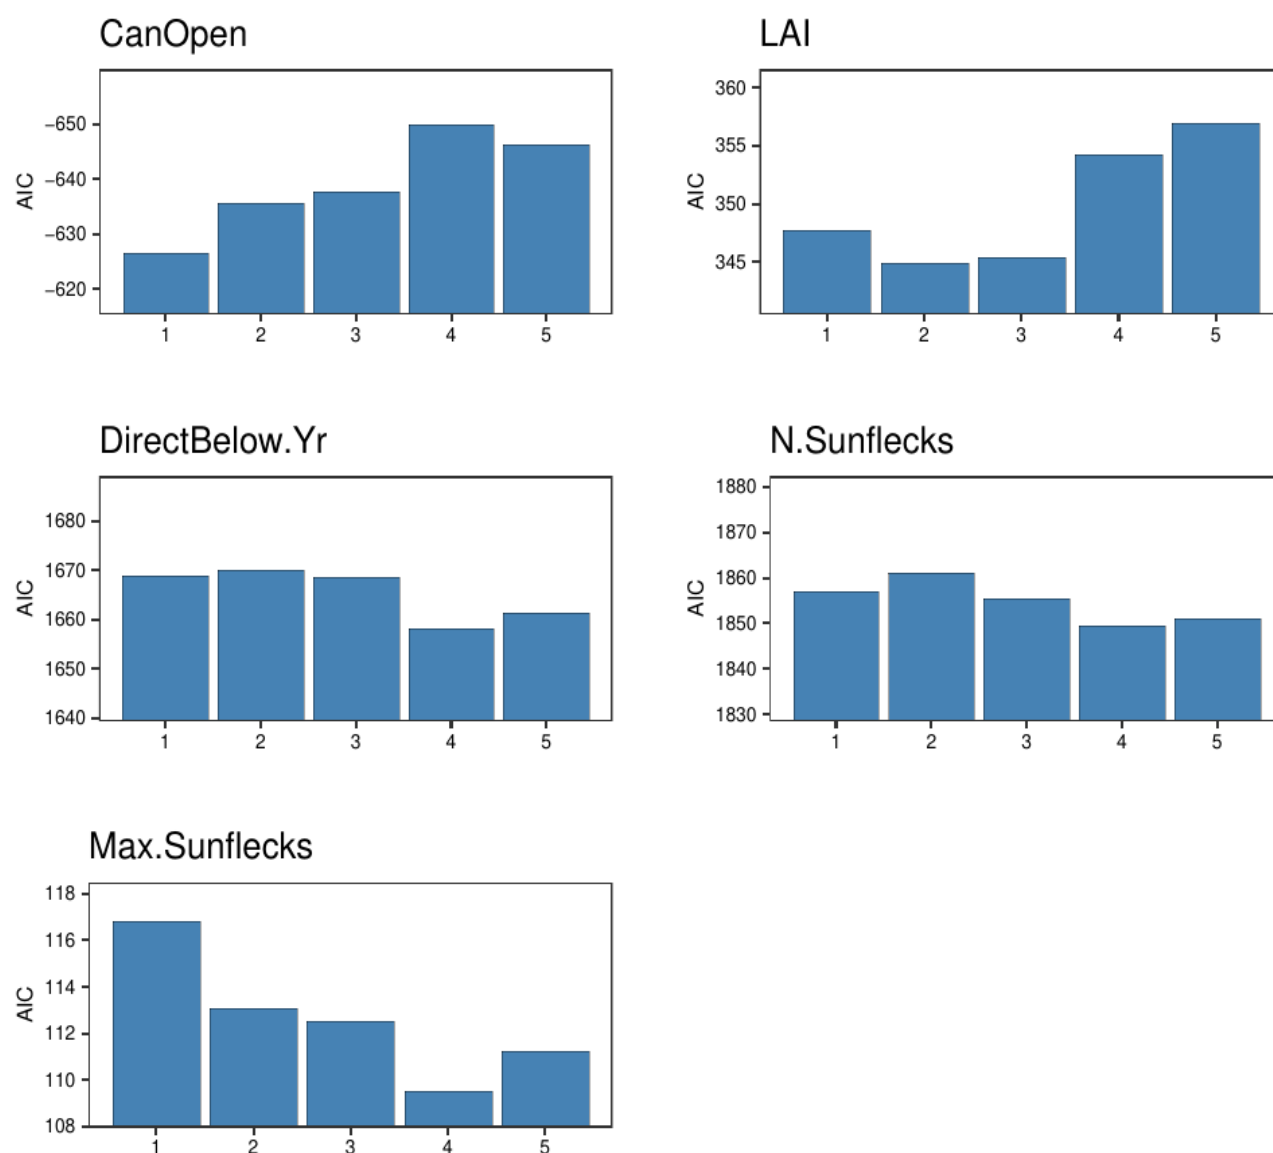

**Figure S10.** Performance of the “best models” explaining the light variables by the proportion of forest canopy and richness at increasing areas or buffers. For each panel, the horizontal axis represent the amount of area extracting the proportion of forest canopy and richness, which ranged from 1.0 to 5.0 m from the centroid of each sampling point, whereas the vertical axis represent the performance (in AIC values) to explain the “best model” which accounted for the lower complexity and higher fit of the model to the data (see Material and Methods in the manuscript for details). For each light variable, we considered the model with the highest performance models as that with the lowest AIC values.

**Table S10.** Co-variance of canopy structural variables, showing correlations between broadleaves canopy cover and riches for the different years of the study and considering different buffer areas around each sampling point.

| Year | Plot | Radius around sampling point |        |        |        |        |
|------|------|------------------------------|--------|--------|--------|--------|
|      |      | 1 m                          | 2 m    | 3 m    | 4 m    | 5 m    |
| 2003 | 1    | 0.883                        | 0.699  | 0.453  | 0.368  | 0.019  |
| 2003 | 2    | 0.961                        | 0.781  | 0.547  | 0.439  | 0.671  |
| 2003 | 3    | 0.883                        | 0.811  | 0.767  | 0.741  | 0.610  |
| 2003 | 4    | 0.693                        | 0.472  | 0.085  | -0.141 | -0.540 |
| 2003 | 5    | 0.770                        | 0.699  | 0.782  | 0.270  | 0.377  |
| 2003 | 6    | 0.877                        | 0.534  | 0.500  | 0.729  | 0.673  |
| 2003 | 7    | 0.961                        | 0.234  | 0.125  | -0.534 | -0.405 |
| 2003 | 8    | 0.883                        | 0.469  | -0.337 | -0.389 | -0.407 |
| 2003 | 9    | 0.929                        | 0.699  | 0.542  | 0.445  | 0.646  |
| 2008 | 1    | 0.814                        | 0.374  | 0.317  | 0.362  | 0.087  |
| 2008 | 2    | 0.869                        | 0.618  | 0.667  | 0.241  | 0.094  |
| 2008 | 3    | 0.862                        | 0.811  | 0.953  | 0.802  | 0.559  |
| 2008 | 4    | 0.866                        | 0.676  | 0.178  | 0.248  | -0.275 |
| 2008 | 5    | 0.967                        | 0.801  | 0.801  | 0.480  | 0.125  |
| 2008 | 6    | 0.560                        | 0.084  | 0.451  | 0.655  | 0.305  |
| 2008 | 7    | 0.338                        | 0.142  | -0.117 | -0.108 | 0.172  |
| 2008 | 8    | 0.701                        | 0.453  | 0.025  | -0.137 | -0.356 |
| 2008 | 9    | 0.928                        | 0.880  | 0.808  | 0.529  | 0.269  |
| 2016 | 1    | 0.524                        | 0.547  | 0.288  | 0.485  | 0.141  |
| 2016 | 2    | 0.877                        | 0.781  | 0.650  | 0.702  | 0.537  |
| 2016 | 3    | 0.840                        | 0.459  | -0.234 | -0.190 | 0.000  |
| 2016 | 4    | 0.835                        | 0.644  | 0.619  | -0.144 | 0.194  |
| 2016 | 5    | 0.780                        | 0.486  | 0.608  | 0.514  | 0.038  |
| 2016 | 6    | 0.711                        | -0.130 | 0.329  | -0.054 | 0.104  |
| 2016 | 7    | 0.190                        | -0.163 | -0.138 | -0.298 | 0.180  |
| 2016 | 8    | 0.816                        | 0.388  | -0.321 | -0.663 | -0.671 |
| 2016 | 9    | 0.699                        | 0.498  | -0.326 | -0.317 | -0.062 |

## References

- QGIS Development Team. 2009. QGIS geographic information system. Open Source Geospatial Foundation.
- R Core Team. 2020. R: A language and environment for statistical computing. R Foundation for Statistical Computing, Vienna, Austria.
- Ter Steege, H. 2018. Hemiphot. R: Free r scripts to analyse hemispherical photographs for canopy openness, leaf area index and photosynthetic active radiation under forest canopies [online]. Naturalis biodiversity center, Leiden, Netherlands.
